# Supplementary material for: Association of Primary Care Physicians’ Individual- and Community-Level Characteristics With Contraceptive Service Provision to Medicaid Beneficiaries
Source: PubMed Central journal article supplement (PMC10024198; doi:10.1001/jamahealthforum.2023.0106), 2023-03-17

## Supplemental Online Content

Bodas M, Strasser J, Luo Q, Schenk E, Chen C. Association of primary care physicians' individual- and community-level characteristics with contraceptive service provision to Medicaid beneficiaries. *JAMA Health Forum*. 2023;4(3):e230106. doi:10.1001/jamahealthforum.2023.0106

**eFigure 1.** Physician Sample Selection Flow Diagram

**eTable 1.** List of Codes Used in the Study

**eTable 2.** Demographic Characteristics of Physicians in the Sample That Provided IUDs or Implants

**eTable 3.** Demographic Characteristics of Physicians in the Sample Prescribing at Least 1 Pill, Patch, or Ring

**eTable 4.** Multivariate Regression Results for the Full Analytical Sample (N = 251 017)

**eFigure 2.** Overview of State Selection Process

**eTable 5.** T-MSIS DQ Atlas Single Topic Summary

**eFigure 3.** An Example of Filling in NPIs in T-MSIS Encounter Claims

**eTable 6.** State Data Quality Assessment and Sample Selection

**eFigure 4.** Physician State Reassignment Process Example

**eFigure 5.** Physician State Reassignment Details

This supplementary material has been provided by the authors to give readers additional information about their work.

**eFigure 1.** Physician Sample Selection Flow Diagram

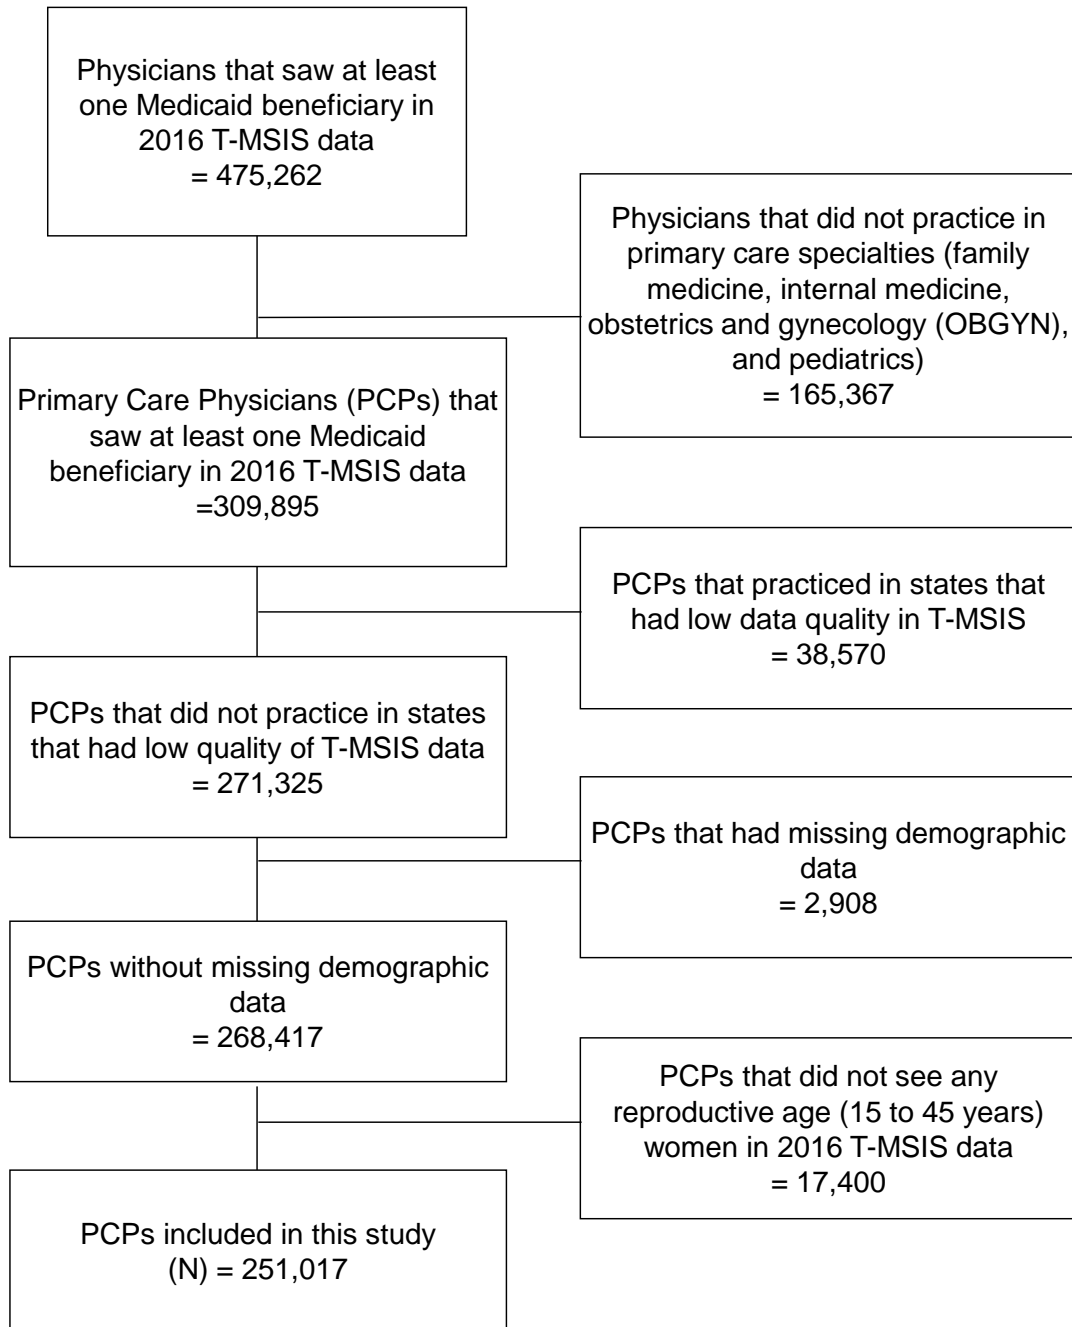

**eTable 1.** List of Codes Used in the Study

| <b>Code</b> | <b>Type</b>                          | <b>Description</b>                  |
|-------------|--------------------------------------|-------------------------------------|
| 58300       | Current Procedural Terminology (CPT) | Intrauterine device (IUD) Insertion |
| 58301       | Current Procedural Terminology (CPT) | IUD Removal                         |
| J1050       | Current Procedural Terminology (CPT) | Birth control shot                  |
| J1051       | Current Procedural Terminology (CPT) | Birth control shot                  |
| J1055       | Current Procedural Terminology (CPT) | Birth control shot                  |
| J7296       | Current Procedural Terminology (CPT) | IUD Insertion/Device                |
| J7297       | Current Procedural Terminology (CPT) | IUD Insertion/Device                |
| J7298       | Current Procedural Terminology (CPT) | IUD Insertion/Device                |
| J7300       | Current Procedural Terminology (CPT) | IUD Insertion/Device                |
| J7301       | Current Procedural Terminology (CPT) | IUD Insertion/Device                |
| J7302       | Current Procedural Terminology (CPT) | IUD Insertion/Device                |
| J7306       | Current Procedural Terminology (CPT) | Contraceptive Implant               |
| J7307       | Current Procedural Terminology (CPT) | Contraceptive Implant               |
| S4981       | Current Procedural Terminology (CPT) | IUD Insertion/Device                |
| S4989       | Current Procedural Terminology (CPT) | IUD Insertion/Device                |
| 003783340   | National Drug Code                   | Transdermal contraceptive patch     |
| 504580192   | National Drug Code                   | Transdermal contraceptive patch     |
| 000082514   | National Drug Code                   | Oral Contraceptive Pill             |
| 000235862   | National Drug Code                   | Oral Contraceptive Pill             |
| 000520261   | National Drug Code                   | Oral Contraceptive Pill             |
| 000520283   | National Drug Code                   | Oral Contraceptive Pill             |
| 000621251   | National Drug Code                   | Oral Contraceptive Pill             |
| 000621411   | National Drug Code                   | Oral Contraceptive Pill             |
| 000621907   | National Drug Code                   | Oral Contraceptive Pill             |
| 000932090   | National Drug Code                   | Oral Contraceptive Pill             |
| 000932140   | National Drug Code                   | Oral Contraceptive Pill             |
| 000933134   | National Drug Code                   | Oral Contraceptive Pill             |
| 000935328   | National Drug Code                   | Oral Contraceptive Pill             |
| 000935423   | National Drug Code                   | Oral Contraceptive Pill             |
| 000936148   | National Drug Code                   | Oral Contraceptive Pill             |
| 003786550   | National Drug Code                   | Oral Contraceptive Pill             |
| 003787272   | National Drug Code                   | Oral Contraceptive Pill             |
| 003787277   | National Drug Code                   | Oral Contraceptive Pill             |
| 003787280   | National Drug Code                   | Oral Contraceptive Pill             |
| 003787281   | National Drug Code                   | Oral Contraceptive Pill             |
| 003787283   | National Drug Code                   | Oral Contraceptive Pill             |
| 003787285   | National Drug Code                   | Oral Contraceptive Pill             |
| 003787287   | National Drug Code                   | Oral Contraceptive Pill             |
| 003787292   | National Drug Code                   | Oral Contraceptive Pill             |
| 003787296   | National Drug Code                   | Oral Contraceptive Pill             |

|           |                    |                         |
|-----------|--------------------|-------------------------|
| 003787298 | National Drug Code | Oral Contraceptive Pill |
| 003787300 | National Drug Code | Oral Contraceptive Pill |
| 003787301 | National Drug Code | Oral Contraceptive Pill |
| 003787306 | National Drug Code | Oral Contraceptive Pill |
| 003787308 | National Drug Code | Oral Contraceptive Pill |
| 004300005 | National Drug Code | Oral Contraceptive Pill |
| 004300010 | National Drug Code | Oral Contraceptive Pill |
| 004300420 | National Drug Code | Oral Contraceptive Pill |
| 004300482 | National Drug Code | Oral Contraceptive Pill |
| 004300530 | National Drug Code | Oral Contraceptive Pill |
| 004300535 | National Drug Code | Oral Contraceptive Pill |
| 004300540 | National Drug Code | Oral Contraceptive Pill |
| 004300570 | National Drug Code | Oral Contraceptive Pill |
| 004300580 | National Drug Code | Oral Contraceptive Pill |
| 005550344 | National Drug Code | Oral Contraceptive Pill |
| 005550715 | National Drug Code | Oral Contraceptive Pill |
| 005559008 | National Drug Code | Oral Contraceptive Pill |
| 005559009 | National Drug Code | Oral Contraceptive Pill |
| 005559010 | National Drug Code | Oral Contraceptive Pill |
| 005559012 | National Drug Code | Oral Contraceptive Pill |
| 005559014 | National Drug Code | Oral Contraceptive Pill |
| 005559016 | National Drug Code | Oral Contraceptive Pill |
| 005559018 | National Drug Code | Oral Contraceptive Pill |
| 005559020 | National Drug Code | Oral Contraceptive Pill |
| 005559025 | National Drug Code | Oral Contraceptive Pill |
| 005559026 | National Drug Code | Oral Contraceptive Pill |
| 005559027 | National Drug Code | Oral Contraceptive Pill |
| 005559028 | National Drug Code | Oral Contraceptive Pill |
| 005559032 | National Drug Code | Oral Contraceptive Pill |
| 005559034 | National Drug Code | Oral Contraceptive Pill |
| 005559043 | National Drug Code | Oral Contraceptive Pill |
| 005559045 | National Drug Code | Oral Contraceptive Pill |
| 005559047 | National Drug Code | Oral Contraceptive Pill |
| 005559049 | National Drug Code | Oral Contraceptive Pill |
| 005559050 | National Drug Code | Oral Contraceptive Pill |
| 005559051 | National Drug Code | Oral Contraceptive Pill |
| 005559064 | National Drug Code | Oral Contraceptive Pill |
| 005559066 | National Drug Code | Oral Contraceptive Pill |
| 005559123 | National Drug Code | Oral Contraceptive Pill |
| 005559131 | National Drug Code | Oral Contraceptive Pill |
| 006033590 | National Drug Code | Oral Contraceptive Pill |
| 006037512 | National Drug Code | Oral Contraceptive Pill |
| 006037521 | National Drug Code | Oral Contraceptive Pill |

|           |                    |                         |
|-----------|--------------------|-------------------------|
| 006037525 | National Drug Code | Oral Contraceptive Pill |
| 006037540 | National Drug Code | Oral Contraceptive Pill |
| 006037606 | National Drug Code | Oral Contraceptive Pill |
| 006037607 | National Drug Code | Oral Contraceptive Pill |
| 006037608 | National Drug Code | Oral Contraceptive Pill |
| 006037609 | National Drug Code | Oral Contraceptive Pill |
| 006037610 | National Drug Code | Oral Contraceptive Pill |
| 006037625 | National Drug Code | Oral Contraceptive Pill |
| 006037634 | National Drug Code | Oral Contraceptive Pill |
| 006037642 | National Drug Code | Oral Contraceptive Pill |
| 006037663 | National Drug Code | Oral Contraceptive Pill |
| 007814058 | National Drug Code | Oral Contraceptive Pill |
| 007814060 | National Drug Code | Oral Contraceptive Pill |
| 007814062 | National Drug Code | Oral Contraceptive Pill |
| 007814075 | National Drug Code | Oral Contraceptive Pill |
| 007815575 | National Drug Code | Oral Contraceptive Pill |
| 007815583 | National Drug Code | Oral Contraceptive Pill |
| 007815584 | National Drug Code | Oral Contraceptive Pill |
| 007815656 | National Drug Code | Oral Contraceptive Pill |
| 007815658 | National Drug Code | Oral Contraceptive Pill |
| 167140073 | National Drug Code | Oral Contraceptive Pill |
| 167140340 | National Drug Code | Oral Contraceptive Pill |
| 167140346 | National Drug Code | Oral Contraceptive Pill |
| 167140347 | National Drug Code | Oral Contraceptive Pill |
| 167140348 | National Drug Code | Oral Contraceptive Pill |
| 167140359 | National Drug Code | Oral Contraceptive Pill |
| 167140360 | National Drug Code | Oral Contraceptive Pill |
| 167140363 | National Drug Code | Oral Contraceptive Pill |
| 167140365 | National Drug Code | Oral Contraceptive Pill |
| 167140366 | National Drug Code | Oral Contraceptive Pill |
| 167140367 | National Drug Code | Oral Contraceptive Pill |
| 167140370 | National Drug Code | Oral Contraceptive Pill |
| 167140404 | National Drug Code | Oral Contraceptive Pill |
| 167140405 | National Drug Code | Oral Contraceptive Pill |
| 167140406 | National Drug Code | Oral Contraceptive Pill |
| 167140407 | National Drug Code | Oral Contraceptive Pill |
| 167140408 | National Drug Code | Oral Contraceptive Pill |
| 167140413 | National Drug Code | Oral Contraceptive Pill |
| 167140416 | National Drug Code | Oral Contraceptive Pill |
| 167140440 | National Drug Code | Oral Contraceptive Pill |
| 167140441 | National Drug Code | Oral Contraceptive Pill |
| 167140464 | National Drug Code | Oral Contraceptive Pill |
| 353560368 | National Drug Code | Oral Contraceptive Pill |

|           |                    |                         |
|-----------|--------------------|-------------------------|
| 353560370 | National Drug Code | Oral Contraceptive Pill |
| 433860620 | National Drug Code | Oral Contraceptive Pill |
| 458020840 | National Drug Code | Oral Contraceptive Pill |
| 501020100 | National Drug Code | Oral Contraceptive Pill |
| 501020120 | National Drug Code | Oral Contraceptive Pill |
| 501020128 | National Drug Code | Oral Contraceptive Pill |
| 501020130 | National Drug Code | Oral Contraceptive Pill |
| 501020154 | National Drug Code | Oral Contraceptive Pill |
| 504190402 | National Drug Code | Oral Contraceptive Pill |
| 504190403 | National Drug Code | Oral Contraceptive Pill |
| 504190405 | National Drug Code | Oral Contraceptive Pill |
| 504190407 | National Drug Code | Oral Contraceptive Pill |
| 504190409 | National Drug Code | Oral Contraceptive Pill |
| 504190482 | National Drug Code | Oral Contraceptive Pill |
| 504190483 | National Drug Code | Oral Contraceptive Pill |
| 504580171 | National Drug Code | Oral Contraceptive Pill |
| 504580176 | National Drug Code | Oral Contraceptive Pill |
| 504580178 | National Drug Code | Oral Contraceptive Pill |
| 504580191 | National Drug Code | Oral Contraceptive Pill |
| 504580194 | National Drug Code | Oral Contraceptive Pill |
| 504580196 | National Drug Code | Oral Contraceptive Pill |
| 504580197 | National Drug Code | Oral Contraceptive Pill |
| 504580251 | National Drug Code | Oral Contraceptive Pill |
| 512850079 | National Drug Code | Oral Contraceptive Pill |
| 512850080 | National Drug Code | Oral Contraceptive Pill |
| 512850081 | National Drug Code | Oral Contraceptive Pill |
| 512850082 | National Drug Code | Oral Contraceptive Pill |
| 512850083 | National Drug Code | Oral Contraceptive Pill |
| 512850087 | National Drug Code | Oral Contraceptive Pill |
| 512850092 | National Drug Code | Oral Contraceptive Pill |
| 512850114 | National Drug Code | Oral Contraceptive Pill |
| 512850120 | National Drug Code | Oral Contraceptive Pill |
| 512850125 | National Drug Code | Oral Contraceptive Pill |
| 512850126 | National Drug Code | Oral Contraceptive Pill |
| 512850127 | National Drug Code | Oral Contraceptive Pill |
| 512850128 | National Drug Code | Oral Contraceptive Pill |
| 512850129 | National Drug Code | Oral Contraceptive Pill |
| 512850131 | National Drug Code | Oral Contraceptive Pill |
| 512850424 | National Drug Code | Oral Contraceptive Pill |
| 512850431 | National Drug Code | Oral Contraceptive Pill |
| 512850546 | National Drug Code | Oral Contraceptive Pill |
| 512850769 | National Drug Code | Oral Contraceptive Pill |
| 512850942 | National Drug Code | Oral Contraceptive Pill |

|           |                    |                         |
|-----------|--------------------|-------------------------|
| 512850943 | National Drug Code | Oral Contraceptive Pill |
| 516600127 | National Drug Code | Oral Contraceptive Pill |
| 516600572 | National Drug Code | Oral Contraceptive Pill |
| 518620007 | National Drug Code | Oral Contraceptive Pill |
| 518620012 | National Drug Code | Oral Contraceptive Pill |
| 518620028 | National Drug Code | Oral Contraceptive Pill |
| 518620036 | National Drug Code | Oral Contraceptive Pill |
| 518620045 | National Drug Code | Oral Contraceptive Pill |
| 518620047 | National Drug Code | Oral Contraceptive Pill |
| 518620072 | National Drug Code | Oral Contraceptive Pill |
| 518620097 | National Drug Code | Oral Contraceptive Pill |
| 518620102 | National Drug Code | Oral Contraceptive Pill |
| 518620238 | National Drug Code | Oral Contraceptive Pill |
| 518620260 | National Drug Code | Oral Contraceptive Pill |
| 518620279 | National Drug Code | Oral Contraceptive Pill |
| 518620284 | National Drug Code | Oral Contraceptive Pill |
| 518620292 | National Drug Code | Oral Contraceptive Pill |
| 518620318 | National Drug Code | Oral Contraceptive Pill |
| 518620470 | National Drug Code | Oral Contraceptive Pill |
| 518620471 | National Drug Code | Oral Contraceptive Pill |
| 518620510 | National Drug Code | Oral Contraceptive Pill |
| 518620545 | National Drug Code | Oral Contraceptive Pill |
| 518620564 | National Drug Code | Oral Contraceptive Pill |
| 525440054 | National Drug Code | Oral Contraceptive Pill |
| 525440064 | National Drug Code | Oral Contraceptive Pill |
| 525440087 | National Drug Code | Oral Contraceptive Pill |
| 525440143 | National Drug Code | Oral Contraceptive Pill |
| 525440165 | National Drug Code | Oral Contraceptive Pill |
| 525440167 | National Drug Code | Oral Contraceptive Pill |
| 525440204 | National Drug Code | Oral Contraceptive Pill |
| 525440219 | National Drug Code | Oral Contraceptive Pill |
| 525440228 | National Drug Code | Oral Contraceptive Pill |
| 525440233 | National Drug Code | Oral Contraceptive Pill |
| 525440235 | National Drug Code | Oral Contraceptive Pill |
| 525440245 | National Drug Code | Oral Contraceptive Pill |
| 525440247 | National Drug Code | Oral Contraceptive Pill |
| 525440248 | National Drug Code | Oral Contraceptive Pill |
| 525440249 | National Drug Code | Oral Contraceptive Pill |
| 525440254 | National Drug Code | Oral Contraceptive Pill |
| 525440259 | National Drug Code | Oral Contraceptive Pill |
| 525440265 | National Drug Code | Oral Contraceptive Pill |
| 525440268 | National Drug Code | Oral Contraceptive Pill |
| 525440274 | National Drug Code | Oral Contraceptive Pill |

|           |                    |                         |
|-----------|--------------------|-------------------------|
| 525440275 | National Drug Code | Oral Contraceptive Pill |
| 525440276 | National Drug Code | Oral Contraceptive Pill |
| 525440279 | National Drug Code | Oral Contraceptive Pill |
| 525440287 | National Drug Code | Oral Contraceptive Pill |
| 525440290 | National Drug Code | Oral Contraceptive Pill |
| 525440291 | National Drug Code | Oral Contraceptive Pill |
| 525440292 | National Drug Code | Oral Contraceptive Pill |
| 525440295 | National Drug Code | Oral Contraceptive Pill |
| 525440298 | National Drug Code | Oral Contraceptive Pill |
| 525440383 | National Drug Code | Oral Contraceptive Pill |
| 525440384 | National Drug Code | Oral Contraceptive Pill |
| 525440550 | National Drug Code | Oral Contraceptive Pill |
| 525440552 | National Drug Code | Oral Contraceptive Pill |
| 525440554 | National Drug Code | Oral Contraceptive Pill |
| 525440629 | National Drug Code | Oral Contraceptive Pill |
| 525440630 | National Drug Code | Oral Contraceptive Pill |
| 525440631 | National Drug Code | Oral Contraceptive Pill |
| 525440847 | National Drug Code | Oral Contraceptive Pill |
| 525440848 | National Drug Code | Oral Contraceptive Pill |
| 525440892 | National Drug Code | Oral Contraceptive Pill |
| 525440936 | National Drug Code | Oral Contraceptive Pill |
| 525440940 | National Drug Code | Oral Contraceptive Pill |
| 525440949 | National Drug Code | Oral Contraceptive Pill |
| 525440950 | National Drug Code | Oral Contraceptive Pill |
| 525440951 | National Drug Code | Oral Contraceptive Pill |
| 525440953 | National Drug Code | Oral Contraceptive Pill |
| 525440954 | National Drug Code | Oral Contraceptive Pill |
| 525440959 | National Drug Code | Oral Contraceptive Pill |
| 525440966 | National Drug Code | Oral Contraceptive Pill |
| 525440967 | National Drug Code | Oral Contraceptive Pill |
| 525440981 | National Drug Code | Oral Contraceptive Pill |
| 525440982 | National Drug Code | Oral Contraceptive Pill |
| 532170091 | National Drug Code | Oral Contraceptive Pill |
| 545690689 | National Drug Code | Oral Contraceptive Pill |
| 545695493 | National Drug Code | Oral Contraceptive Pill |
| 545695796 | National Drug Code | Oral Contraceptive Pill |
| 545695816 | National Drug Code | Oral Contraceptive Pill |
| 548684369 | National Drug Code | Oral Contraceptive Pill |
| 548684730 | National Drug Code | Oral Contraceptive Pill |
| 548684744 | National Drug Code | Oral Contraceptive Pill |
| 548684754 | National Drug Code | Oral Contraceptive Pill |
| 548684814 | National Drug Code | Oral Contraceptive Pill |
| 548684828 | National Drug Code | Oral Contraceptive Pill |



|           |                    |                         |
|-----------|--------------------|-------------------------|
| 548685326 | National Drug Code | Oral Contraceptive Pill |
| 548685826 | National Drug Code | Oral Contraceptive Pill |
| 548686210 | National Drug Code | Oral Contraceptive Pill |
| 552890887 | National Drug Code | Oral Contraceptive Pill |
| 580164827 | National Drug Code | Oral Contraceptive Pill |
| 651620316 | National Drug Code | Oral Contraceptive Pill |
| 651620347 | National Drug Code | Oral Contraceptive Pill |
| 669930611 | National Drug Code | Oral Contraceptive Pill |
| 669930615 | National Drug Code | Oral Contraceptive Pill |
| 681800837 | National Drug Code | Oral Contraceptive Pill |
| 681800838 | National Drug Code | Oral Contraceptive Pill |
| 681800843 | National Drug Code | Oral Contraceptive Pill |
| 681800844 | National Drug Code | Oral Contraceptive Pill |
| 681800846 | National Drug Code | Oral Contraceptive Pill |
| 681800848 | National Drug Code | Oral Contraceptive Pill |
| 681800854 | National Drug Code | Oral Contraceptive Pill |
| 681800857 | National Drug Code | Oral Contraceptive Pill |
| 681800864 | National Drug Code | Oral Contraceptive Pill |
| 681800865 | National Drug Code | Oral Contraceptive Pill |
| 681800866 | National Drug Code | Oral Contraceptive Pill |
| 681800873 | National Drug Code | Oral Contraceptive Pill |
| 681800875 | National Drug Code | Oral Contraceptive Pill |
| 681800876 | National Drug Code | Oral Contraceptive Pill |
| 681800877 | National Drug Code | Oral Contraceptive Pill |
| 681800880 | National Drug Code | Oral Contraceptive Pill |
| 681800882 | National Drug Code | Oral Contraceptive Pill |
| 681800886 | National Drug Code | Oral Contraceptive Pill |
| 681800892 | National Drug Code | Oral Contraceptive Pill |
| 681800893 | National Drug Code | Oral Contraceptive Pill |
| 681800898 | National Drug Code | Oral Contraceptive Pill |
| 681800899 | National Drug Code | Oral Contraceptive Pill |
| 681800902 | National Drug Code | Oral Contraceptive Pill |
| 681800903 | National Drug Code | Oral Contraceptive Pill |
| 684620132 | National Drug Code | Oral Contraceptive Pill |
| 684620303 | National Drug Code | Oral Contraceptive Pill |
| 684620305 | National Drug Code | Oral Contraceptive Pill |
| 684620309 | National Drug Code | Oral Contraceptive Pill |
| 684620316 | National Drug Code | Oral Contraceptive Pill |
| 684620318 | National Drug Code | Oral Contraceptive Pill |
| 684620388 | National Drug Code | Oral Contraceptive Pill |
| 684620394 | National Drug Code | Oral Contraceptive Pill |
| 684620556 | National Drug Code | Oral Contraceptive Pill |
| 684620565 | National Drug Code | Oral Contraceptive Pill |

|           |                    |                         |
|-----------|--------------------|-------------------------|
| 684620637 | National Drug Code | Oral Contraceptive Pill |
| 684620646 | National Drug Code | Oral Contraceptive Pill |
| 684620656 | National Drug Code | Oral Contraceptive Pill |
| 684620657 | National Drug Code | Oral Contraceptive Pill |
| 684620672 | National Drug Code | Oral Contraceptive Pill |
| 684620719 | National Drug Code | Oral Contraceptive Pill |
| 684620720 | National Drug Code | Oral Contraceptive Pill |
| 684620733 | National Drug Code | Oral Contraceptive Pill |
| 692381531 | National Drug Code | Oral Contraceptive Pill |
| 758540601 | National Drug Code | Oral Contraceptive Pill |
| 763880283 | National Drug Code | Oral Contraceptive Pill |
| 000520273 | National Drug Code | Birth Control Ring      |
| 353560410 | National Drug Code | Birth Control Ring      |
| 548684832 | National Drug Code | Birth Control Ring      |

| <b>eTable 2. Demographic Characteristics of Physicians in the Sample That Provided IUDs and Implants</b> |                              |                                                      |                            |                                                                      |                              |                                                                        |                     |                                                            |                     |                                                         |
|----------------------------------------------------------------------------------------------------------|------------------------------|------------------------------------------------------|----------------------------|----------------------------------------------------------------------|------------------------------|------------------------------------------------------------------------|---------------------|------------------------------------------------------------|---------------------|---------------------------------------------------------|
|                                                                                                          | 1                            | 2                                                    | 3                          | 4                                                                    | 5                            | 6                                                                      | 7                   | 8                                                          | 9                   | 10                                                      |
|                                                                                                          | All physicians in the sample | Physicians that provided at least one IUD or implant | Family Medicine physicians | Family Medicine physicians that provided at least one IUD or implant | Internal Medicine physicians | Internal Medicine physicians that provided at least one IUD or implant | OBGYN               | OBGYN physicians that provided at least one IUD or implant | Pediatricians       | Pediatricians that provided at least one IUD or implant |
| Physicians (N)                                                                                           | 251017                       | 25115                                                | 86106                      | 7262                                                                 | 85095                        | 606                                                                    | 35994               | 16481                                                      | 43822               | 766                                                     |
| Practice Characteristics, mean (SD)                                                                      |                              |                                                      |                            |                                                                      |                              |                                                                        |                     |                                                            |                     |                                                         |
| Mean Number of Beneficiaries Provided IUDs and Implants                                                  | 1.6 (19.7)                   | 15.6 (60.5)                                          | 0.8 (18.6)                 | 9.8 (63.5)                                                           | 0.1 (4.9)                    | 7.7 (57.6)                                                             | 8.7 (41.9)          | 19.0 (60.3)                                                | 0.1 (2.4)           | 6.1 (17.3)                                              |
| Mean Number of Female Reproductive Age Medicaid Beneficiaries                                            | 97.6 (229.4)                 | 357.8 (521.9)                                        | 101.1 (213.3)              | 276.1 (519.5)                                                        | 51.1 (133.6)                 | 548.2 (830.2)                                                          | 249.3 (415.1)       | 387.7 (507.3)                                              | 56.4 (105.4)        | 337.4 (423.1)                                           |
| Specialty, No. (%)                                                                                       |                              |                                                      |                            |                                                                      |                              |                                                                        |                     |                                                            |                     |                                                         |
| Family Medicine                                                                                          | 86106 (34)                   | 7262 (29)                                            |                            |                                                                      |                              |                                                                        |                     |                                                            |                     |                                                         |
| Internal Medicine                                                                                        | 85095 (34)                   | 606 (2)                                              |                            |                                                                      |                              |                                                                        |                     |                                                            |                     |                                                         |
| OB-GYN                                                                                                   | 35994 (14)                   | 16481 (66)                                           |                            |                                                                      |                              |                                                                        |                     |                                                            |                     |                                                         |
| Pediatrics                                                                                               | 43822 (17)                   | 766 (3)                                              |                            |                                                                      |                              |                                                                        |                     |                                                            |                     |                                                         |
| Physician Characteristics, No. (%)                                                                       |                              |                                                      |                            |                                                                      |                              |                                                                        |                     |                                                            |                     |                                                         |
| Male,                                                                                                    | 134643 (54)                  | 10640 (42)                                           | 51363 (60)                 | 2981 (41)                                                            | 52185 (61)                   | 395 (65)                                                               | 14967 (42)          | 7003 (42)                                                  | 16128 (37)          | 261 (34)                                                |
| Female                                                                                                   | 116374 (46)                  | 14475 (58)                                           | 34743 (40)                 | 4281 (59)                                                            | 32910 (39)                   | 211 (35)                                                               | 21027 (58)          | 9478 (58)                                                  | 27694 (63)          | 505 (66)                                                |
| Doctors of Osteopathy                                                                                    | 22886 (9)                    | 2130 (8)                                             | 13689 (16)                 | 834 (11)                                                             | 4792 (6)                     | 32 (5)                                                                 | 2364 (7)            | 1237 (8)                                                   | 2041 (5)            | 27 (4)                                                  |
| International medical graduates                                                                          | 70589 (28)                   | 3446 (14)                                            | 20448 (24)                 | 1005 (14)                                                            | 33935 (40)                   | 167 (28)                                                               | 5190 (14)           | 2162 (13)                                                  | 11016 (25)          | 112 (15)                                                |
| Age, mean (SD), Years                                                                                    | 49.2 (12.6)                  | 47.7 (11.0)                                          | 49.8 (12.6)                | 45.0 (10.7)                                                          | 48.7 (12.4)                  | 50.6 (10.5)                                                            | 48.7 (12.7)         | 48.7 (10.9)                                                | 49.4 (12.6)         | 48.7 (11.2)                                             |
| Age 25 to 34 Years                                                                                       | 36554 (15)                   | 3052 (12)                                            | 11678 (14)                 | 1349 (19)                                                            | 12924 (15)                   | 43 (7)                                                                 | 5835 (16)           | 1588 (10)                                                  | 6117 (14)           | 72 (9)                                                  |
| Age 35 to 44 Years                                                                                       | 60446 (24)                   | 7771 (31)                                            | 20209 (23)                 | 2530 (35)                                                            | 20995 (25)                   | 137 (23)                                                               | 8730 (24)           | 4878 (30)                                                  | 10512 (24)          | 226 (30)                                                |
| Age 45 to 54 Years                                                                                       | 65942 (26)                   | 7159 (29)                                            | 22125 (26)                 | 1800 (25)                                                            | 22927 (27)                   | 197 (33)                                                               | 9238 (26)           | 4937 (30)                                                  | 11652 (27)          | 225 (29)                                                |
| Age 55 to 64 Years                                                                                       | 56435 (22)                   | 5224 (21)                                            | 20542 (24)                 | 1237 (17)                                                            | 18618 (22)                   | 172 (28)                                                               | 7658 (21)           | 3643 (22)                                                  | 9617 (22)           | 172 (22)                                                |
| Age More than 65 Years                                                                                   | 31640 (13)                   | 1909 (8)                                             | 11552 (13)                 | 346 (5)                                                              | 9631 (11)                    | 57 (9)                                                                 | 4533 (13)           | 1435 (9)                                                   | 5924 (14)           | 71 (9)                                                  |
| Physician Located in a Rural County                                                                      | 15463 (6)                    | 1928 (8)                                             | 9388 (11)                  | 1041 (14)                                                            | 3365 (4)                     | 58 (10)                                                                | 1370 (4)            | 790 (5)                                                    | 1340 (3)            | 39 (5)                                                  |
| County Characteristics, mean (SD)                                                                        |                              |                                                      |                            |                                                                      |                              |                                                                        |                     |                                                            |                     |                                                         |
| Mean county female population 15 to 44 years                                                             | 278929.4 (446138.1)          | 184673.2 (296620.1)                                  | 233379.1 (427807.6)        | 158540.8 (287621.2)                                                  | 304965.9 (459168.3)          | 152448.5 (285224.3)                                                    | 304593.8 (451487.9) | 199908.5 (302256.9)                                        | 296793.0 (444326.6) | 130114.0 (235513.4)                                     |

|                                                                                                                                                                                                                                                                                                                                                                                                               |             |             |             |             |             |             |             |             |             |             |
|---------------------------------------------------------------------------------------------------------------------------------------------------------------------------------------------------------------------------------------------------------------------------------------------------------------------------------------------------------------------------------------------------------------|-------------|-------------|-------------|-------------|-------------|-------------|-------------|-------------|-------------|-------------|
| County % population below poverty line                                                                                                                                                                                                                                                                                                                                                                        | 14.4 (5.1)  | 14.4 (4.9)  | 14.5 (5.0)  | 14.0 (4.6)  | 14.5 (5.1)  | 16.4 (4.6)  | 14.5 (5.1)  | 14.4 (5.1)  | 14.2 (5.2)  | 15.2 (4.6)  |
| County % population AIAN                                                                                                                                                                                                                                                                                                                                                                                      | 1.6 (3.7)   | 1.6 (3.4)   | 1.8 (4.5)   | 2.0 (4.0)   | 1.5 (3.2)   | 1.0 (3.3)   | 1.5 (3.1)   | 1.4 (3.1)   | 1.5 (3.4)   | 1.2 (2.6)   |
| County % population Asian                                                                                                                                                                                                                                                                                                                                                                                     | 6.6 (7.2)   | 5.2 (6.1)   | 5.4 (6.4)   | 5.0 (6.1)   | 7.3 (7.7)   | 3.5 (4.8)   | 7.1 (7.5)   | 5.4 (6.2)   | 7.2 (7.4)   | 3.9 (5.1)   |
| County % population Black                                                                                                                                                                                                                                                                                                                                                                                     | 14.8 (14.0) | 14.2 (14.3) | 12.2 (13.0) | 9.7 (12.2)  | 16.1 (14.3) | 19.8 (19.1) | 16.4 (14.3) | 15.9 (14.4) | 16.0 (14.1) | 17.5 (16.3) |
| County % population Hispanic                                                                                                                                                                                                                                                                                                                                                                                  | 18.0 (16.2) | 15.1 (14.8) | 16.9 (16.6) | 14.3 (13.9) | 18.2 (15.6) | 10.2 (11.8) | 18.9 (16.3) | 15.9 (15.4) | 19.1 (16.5) | 10.9 (11.3) |
| County % population White                                                                                                                                                                                                                                                                                                                                                                                     | 74.2 (15.5) | 76.3 (15.8) | 77.8 (14.8) | 80.4 (14.3) | 72.3 (15.6) | 73.5 (19.5) | 72.3 (15.4) | 74.6 (15.9) | 72.5 (15.3) | 75.0 (16.8) |
| State Policy Characteristics, No. (%)                                                                                                                                                                                                                                                                                                                                                                         |             |             |             |             |             |             |             |             |             |             |
| Practice in a state that expanded Medicaid 2016,                                                                                                                                                                                                                                                                                                                                                              | 174529 (70) | 15697 (63)  | 56915 (66)  | 4926 (68)   | 62772 (74)  | 155 (26)    | 24609 (68)  | 10365 (63)  | 30233 (69)  | 251 (33)    |
| Practice in a state with Medicaid family planning waiver,                                                                                                                                                                                                                                                                                                                                                     | 165096 (66) | 15606 (62)  | 56487 (66)  | 4617 (64)   | 56304 (66)  | 161 (27)    | 23611 (66)  | 10537 (64)  | 28694 (65)  | 291 (38)    |
| NOTES - Reproductive age = 15 to 44 years<br>County - county in which a physician is located<br>AIAN - American Indian/Alaska Native<br>OBGYN - obstetrics and gynecology<br>SD - standard deviation<br>SOURCES - Transformed Medicaid Statistical Information System (T-MSIS) data, 2016; American Medical Association (AMA) Masterfile (2016); American Community Survey (ACS) and Kaiser Family Foundation |             |             |             |             |             |             |             |             |             |             |

**eTable 3. Demographic Characteristics of Physicians in the Sample Prescribing at Least 1 Pill, Patch, or Ring**

|                                                                         | 1                            | 2                                                          | 3                          | 4                                                                          | 7                            | 8                                                                            | 5                   | 6                                                                | 9                   | 10                                                            |
|-------------------------------------------------------------------------|------------------------------|------------------------------------------------------------|----------------------------|----------------------------------------------------------------------------|------------------------------|------------------------------------------------------------------------------|---------------------|------------------------------------------------------------------|---------------------|---------------------------------------------------------------|
|                                                                         | All physicians in the sample | Physicians that prescribed at least one pill patch or ring | Family Medicine physicians | Family Medicine physicians that prescribed at least one pill patch or ring | Internal Medicine physicians | Internal Medicine physicians that prescribed at least one pill patch or ring | OBGYN               | OBGYN physicians that prescribed at least one pill patch or ring | Pediatricians       | Pediatricians that prescribed at least one pill patch or ring |
| Physicians (N)                                                          | 251017                       | 121167                                                     | 86106                      | 51032                                                                      | 85095                        | 21400                                                                        | 35994               | 29833                                                            | 43822               | 18902                                                         |
| Practice Characteristics, mean (SD)                                     |                              |                                                            |                            |                                                                            |                              |                                                                              |                     |                                                                  |                     |                                                               |
| Mean Number of Beneficiaries Provided At Least One Pill, Patch and Ring | 5.8 (22.3)                   | 12.1 (30.9)                                                | 4.4 (18.0)                 | 7.5 (23.0)                                                                 | 1.1 (5.5)                    | 4.3 (10.4)                                                                   | 24.6 (46.1)         | 29.7 (49.2)                                                      | 2.4 (7.1)           | 5.6 (10.0)                                                    |
| Mean Number of Female Reproductive Age Medicaid Beneficiaries           | 97.6 (229.4)                 | 150.6 (289.2)                                              | 101.1 (213.3)              | 129.1 (251.6)                                                              | 51.1 (133.6)                 | 103.5 (214.9)                                                                | 249.3 (415.1)       | 264.7 (411.6)                                                    | 56.4 (105.4)        | 82.1 (129.0)                                                  |
| Specialty, No. (%)                                                      |                              |                                                            |                            |                                                                            |                              |                                                                              |                     |                                                                  |                     |                                                               |
| Family Medicine                                                         | 86106 (34)                   | 51032 (42)                                                 |                            |                                                                            |                              |                                                                              |                     |                                                                  |                     |                                                               |
| Internal Medicine                                                       | 85095 (34)                   | 21400 (18)                                                 |                            |                                                                            |                              |                                                                              |                     |                                                                  |                     |                                                               |
| OB-GYN                                                                  | 35994 (14)                   | 29833 (25)                                                 |                            |                                                                            |                              |                                                                              |                     |                                                                  |                     |                                                               |
| Pediatrics                                                              | 43822 (17)                   | 18902 (16)                                                 |                            |                                                                            |                              |                                                                              |                     |                                                                  |                     |                                                               |
| Physician Characteristics, No. (%)                                      |                              |                                                            |                            |                                                                            |                              |                                                                              |                     |                                                                  |                     |                                                               |
| Male                                                                    | 134643 (54)                  | 55397 (46)                                                 | 51363 (60)                 | 26909 (53)                                                                 | 52185 (61)                   | 10734 (50)                                                                   | 14967 (42)          | 12106 (41)                                                       | 16128 (37)          | 5648 (30)                                                     |
| Female                                                                  | 116374 (46)                  | 65770 (54)                                                 | 34743 (40)                 | 24123 (47)                                                                 | 32910 (39)                   | 10666 (50)                                                                   | 21027 (58)          | 17727 (59)                                                       | 27694 (63)          | 13254 (70)                                                    |
| Doctors of Osteopathy                                                   | 22886 (9)                    | 12000 (10)                                                 | 13689 (16)                 | 7944 (16)                                                                  | 4792 (6)                     | 1120 (5)                                                                     | 2364 (7)            | 2038 (7)                                                         | 2041 (5)            | 898 (5)                                                       |
| International medical graduates                                         | 70589 (28)                   | 28247 (23)                                                 | 20448 (24)                 | 11617 (23)                                                                 | 33935 (40)                   | 8030 (38)                                                                    | 5190 (14)           | 4295 (14)                                                        | 11016 (25)          | 4305 (23)                                                     |
| Age, mean (SD), Years                                                   | 49.2 (12.6)                  | 48.5 (12.1)                                                | 49.8 (12.6)                | 48.1 (12.2)                                                                | 48.7 (12.4)                  | 49.6 (11.4)                                                                  | 48.7 (12.7)         | 48.4 (12.4)                                                      | 49.4 (12.6)         | 48.5 (11.8)                                                   |
| Age 25 to 34 Years                                                      | 36554 (15)                   | 17853 (15)                                                 | 11678 (14)                 | 8159 (16)                                                                  | 12924 (15)                   | 2425 (11)                                                                    | 5835 (16)           | 4808 (16)                                                        | 6117 (14)           | 2461 (13)                                                     |
| Age 35 to 44 Years                                                      | 60446 (24)                   | 30509 (25)                                                 | 20209 (23)                 | 13189 (26)                                                                 | 20995 (25)                   | 4877 (23)                                                                    | 8730 (24)           | 7350 (25)                                                        | 10512 (24)          | 5093 (27)                                                     |
| Age 45 to 54 Years                                                      | 65942 (26)                   | 33212 (27)                                                 | 22125 (26)                 | 13293 (26)                                                                 | 22927 (27)                   | 6677 (31)                                                                    | 9238 (26)           | 7877 (26)                                                        | 11652 (27)          | 5365 (28)                                                     |
| Age 55 to 64 Years                                                      | 56435 (22)                   | 27056 (22)                                                 | 20542 (24)                 | 11277 (22)                                                                 | 18618 (22)                   | 5338 (25)                                                                    | 7658 (21)           | 6374 (21)                                                        | 9617 (22)           | 4067 (22)                                                     |
| Age More than 65 Years                                                  | 31640 (13)                   | 12537 (10)                                                 | 11552 (13)                 | 5114 (10)                                                                  | 9631 (11)                    | 2083 (10)                                                                    | 4533 (13)           | 3424 (11)                                                        | 5924 (14)           | 1916 (10)                                                     |
| Physician Located in a Rural County                                     | 15463 (6)                    | 8393 (7)                                                   | 9388 (11)                  | 5597 (11)                                                                  | 3365 (4)                     | 908 (4)                                                                      | 1370 (4)            | 1131 (4)                                                         | 1340 (3)            | 757 (4)                                                       |
| County Characteristics, mean (SD)                                       |                              |                                                            |                            |                                                                            |                              |                                                                              |                     |                                                                  |                     |                                                               |
| Mean county female population 15 to 44 years                            | 278929.4 (446138.1)          | 286992.4 (470841.8)                                        | 233379.1 (427807.6)        | 247221.6 (454559.9)                                                        | 304965.9 (459168.3)          | 369812.6 (537280.3)                                                          | 304593.8 (451487.9) | 300969.8 (455095.5)                                              | 296793.0 (444326.6) | 278540.4 (444041.6)                                           |

|                                                                                                                                                                                                                                                                                                                                                                                                               |             |             |             |             |             |             |             |             |             |             |
|---------------------------------------------------------------------------------------------------------------------------------------------------------------------------------------------------------------------------------------------------------------------------------------------------------------------------------------------------------------------------------------------------------------|-------------|-------------|-------------|-------------|-------------|-------------|-------------|-------------|-------------|-------------|
| County % population below poverty line                                                                                                                                                                                                                                                                                                                                                                        | 14.4 (5.1)  | 14.5 (5.0)  | 14.5 (5.0)  | 14.4 (4.9)  | 14.5 (5.1)  | 14.6 (5.1)  | 14.5 (5.1)  | 14.5 (5.0)  | 14.2 (5.2)  | 14.3 (5.1)  |
| County % population AIAN                                                                                                                                                                                                                                                                                                                                                                                      | 1.6 (3.7)   | 1.6 (3.5)   | 1.8 (4.5)   | 1.8 (4.0)   | 1.5 (3.2)   | 1.5 (3.2)   | 1.5 (3.1)   | 1.5 (3.0)   | 1.5 (3.4)   | 1.5 (3.1)   |
| County % population Asian                                                                                                                                                                                                                                                                                                                                                                                     | 6.6 (7.2)   | 6.5 (7.2)   | 5.4 (6.4)   | 5.6 (6.6)   | 7.3 (7.7)   | 8.1 (7.9)   | 7.1 (7.5)   | 7.0 (7.4)   | 7.2 (7.4)   | 6.8 (7.1)   |
| County % population Black                                                                                                                                                                                                                                                                                                                                                                                     | 14.8 (14.0) | 13.9 (13.6) | 12.2 (13.0) | 11.5 (12.5) | 16.1 (14.3) | 15.3 (13.7) | 16.4 (14.3) | 16.2 (14.3) | 16.0 (14.1) | 14.9 (13.9) |
| County % population Hispanic                                                                                                                                                                                                                                                                                                                                                                                  | 18.0 (16.2) | 18.1 (16.3) | 16.9 (16.6) | 17.0 (16.4) | 18.2 (15.6) | 19.4 (15.9) | 18.9 (16.3) | 18.8 (16.4) | 19.1 (16.5) | 18.3 (16.4) |
| County % population White                                                                                                                                                                                                                                                                                                                                                                                     | 74.2 (15.5) | 75.1 (15.2) | 77.8 (14.8) | 78.3 (14.5) | 72.3 (15.6) | 72.2 (15.2) | 72.3 (15.4) | 72.5 (15.5) | 72.5 (15.3) | 74.0 (15.2) |
| State Policy Characteristics, No. (%)                                                                                                                                                                                                                                                                                                                                                                         |             |             |             |             |             |             |             |             |             |             |
| Practice in a state that expanded Medicaid 2016,                                                                                                                                                                                                                                                                                                                                                              | 174529 (70) | 87262 (72)  | 56915 (66)  | 35933 (70)  | 62772 (74)  | 17506 (82)  | 24609 (68)  | 20541 (69)  | 30233 (69)  | 13282 (70)  |
| Practice in a state with Medicaid family planning waiver,                                                                                                                                                                                                                                                                                                                                                     | 165096 (66) | 80319 (66)  | 56487 (66)  | 34061 (67)  | 56304 (66)  | 14002 (65)  | 23611 (66)  | 19639 (66)  | 28694 (65)  | 12617 (67)  |
| NOTES - Reproductive age = 15 to 44 years<br>County - county in which a physician is located<br>AIAN - American Indian/Alaska Native<br>OBGYN - obstetrics and gynecology<br>SD - standard deviation<br>SOURCES - Transformed Medicaid Statistical Information System (T-MSIS) data, 2016; American Medical Association (AMA) Masterfile (2016); American Community Survey (ACS) and Kaiser Family Foundation |             |             |             |             |             |             |             |             |             |             |

**eTable 4.** Multivariate Regression Results for the Full Analytical Sample (N = 251 017)

| Outcome                                                                                                                                 | 1<br>Total Number of Medicaid Beneficiaries Provided IUDs and Implants in 2016 |                         | 2<br>Total Number of Medicaid Beneficiaries Prescribed Pill Patch and Ring in 2016 |                         | 3<br>Odds of Providing IUDs and Implants to Medicaid Beneficiaries by Physicians 2016 |                         | 4<br>Odds of Prescribing Pill Patch and Ring in 2016 to Medicaid Beneficiaries by Physicians 2016 |                         |
|-----------------------------------------------------------------------------------------------------------------------------------------|--------------------------------------------------------------------------------|-------------------------|------------------------------------------------------------------------------------|-------------------------|---------------------------------------------------------------------------------------|-------------------------|---------------------------------------------------------------------------------------------------|-------------------------|
|                                                                                                                                         | Average Marginal Effect                                                        | 95% Confidence Interval | Average Marginal Effect                                                            | 95% Confidence Interval | Odds Ratio                                                                            | 95% Confidence Interval | Odds Ratio                                                                                        | 95% Confidence Interval |
| <b>Physician Characteristics</b>                                                                                                        |                                                                                |                         |                                                                                    |                         |                                                                                       |                         |                                                                                                   |                         |
| Female                                                                                                                                  | 0.51**                                                                         | (0.26 - 0.76)           | 2.39**                                                                             | (1.91 - 2.87)           | 1.62**                                                                                | (1.48 - 1.77)           | 1.88**                                                                                            | (1.76 - 2.00)           |
| Doctor of Osteopathy                                                                                                                    | -0.50**                                                                        | (-0.67 - -0.34)         | -0.20                                                                              | (-0.67 - 0.28)          | 0.68**                                                                                | (0.61 - 0.76)           | 1.03                                                                                              | (0.95 - 1.10)           |
| International Medical Graduate                                                                                                          | -1.13**                                                                        | (-1.29 - -0.97)         | -1.58**                                                                            | (-2.38 - -0.79)         | 0.39**                                                                                | (0.33 - 0.46)           | 0.64**                                                                                            | (0.58 - 0.71)           |
| Age 35 to 44 Years                                                                                                                      | 1.33**                                                                         | (1.02 - 1.64)           | 3.46**                                                                             | (2.54 - 4.39)           | 1.69**                                                                                | (1.53 - 1.88)           | 1.10                                                                                              | (0.99 - 1.22)           |
| Age 45 to 54 Years                                                                                                                      | 1.03**                                                                         | (0.72 - 1.35)           | 4.03**                                                                             | (2.86 - 5.19)           | 1.39**                                                                                | (1.19 - 1.61)           | 1.15*                                                                                             | (1.01 - 1.29)           |
| Age 55 to 64 Years                                                                                                                      | 0.67**                                                                         | (0.41 - 0.93)           | 3.97**                                                                             | (2.84 - 5.11)           | 1.20*                                                                                 | (1.01 - 1.43)           | 1.11                                                                                              | (0.99 - 1.24)           |
| Age More than 65 Years                                                                                                                  | 0.38                                                                           | (-0.40 - 1.17)          | 4.06**                                                                             | (2.35 - 5.77)           | 0.89                                                                                  | (0.73 - 1.08)           | 0.89                                                                                              | (0.78 - 1.01)           |
| <b>County Characteristics</b>                                                                                                           |                                                                                |                         |                                                                                    |                         |                                                                                       |                         |                                                                                                   |                         |
| Rural                                                                                                                                   | -0.68**                                                                        | (-0.92 - -0.43)         | -0.67                                                                              | (-1.35 - 0.00)          | 0.84*                                                                                 | (0.71 - 0.98)           | 1.18*                                                                                             | (1.03 - 1.36)           |
| Log of county female population 15 to 44 years                                                                                          | -0.28**                                                                        | (-0.46 - -0.09)         | -0.16                                                                              | (-0.50 - 0.19)          | 0.93                                                                                  | (0.86 - 1.01)           | 0.99                                                                                              | (0.94 - 1.05)           |
| County percent population below poverty line                                                                                            | 0.04**                                                                         | (0.01 - 0.08)           | 0.24**                                                                             | (0.15 - 0.33)           | 1.01                                                                                  | (0.99 - 1.03)           | 1.03**                                                                                            | (1.01 - 1.04)           |
| County percent population Asian                                                                                                         | -0.02                                                                          | (-0.04 - 0.00)          | -0.12**                                                                            | (-0.19 - -0.06)         | 0.98*                                                                                 | (0.96 - 1.00)           | 1.00                                                                                              | (0.99 - 1.01)           |
| County percent population Black                                                                                                         | 0.02                                                                           | (-0.01 - 0.05)          | -0.01                                                                              | (-0.08 - 0.06)          | 0.99                                                                                  | (0.99 - 1.00)           | 0.99**                                                                                            | (0.98 - 0.99)           |
| County percent population Hispanic                                                                                                      | -0.01                                                                          | (-0.02 - 0.00)          | -0.02                                                                              | (-0.05 - 0.01)          | 0.99                                                                                  | (0.98 - 1.00)           | 1.00                                                                                              | (0.99 - 1.01)           |
| County percent population AIAN                                                                                                          | 0.02**                                                                         | (0.01 - 0.03)           | 0.02                                                                               | (-0.02 - 0.07)          | 1.00                                                                                  | (0.98 - 1.01)           | 0.99*                                                                                             | (0.98 - 1.00)           |
| <b>State Policy Characteristics</b>                                                                                                     |                                                                                |                         |                                                                                    |                         |                                                                                       |                         |                                                                                                   |                         |
| State expanded Medicaid by 2016                                                                                                         | -0.06                                                                          | (-0.45 - 0.34)          | 2.52**                                                                             | (1.24 - 3.80)           | 0.85                                                                                  | (0.64 - 1.14)           | 1.27                                                                                              | (0.99 - 1.63)           |
| State has a family planning waiver                                                                                                      | 0.26                                                                           | (-0.18 - 0.70)          | 0.38                                                                               | (-0.88 - 1.65)          | 0.86                                                                                  | (0.58 - 1.27)           | 1.05                                                                                              | (0.82 - 1.34)           |
| Confidence intervals in parentheses<br>** p<0.01, * p<0.05<br>AIAN - American Indian/Alaska Native<br>OBGYN – obstetrics and gynecology |                                                                                |                         |                                                                                    |                         |                                                                                       |                         |                                                                                                   |                         |

**eFigure 2.** Overview of State Selection Process

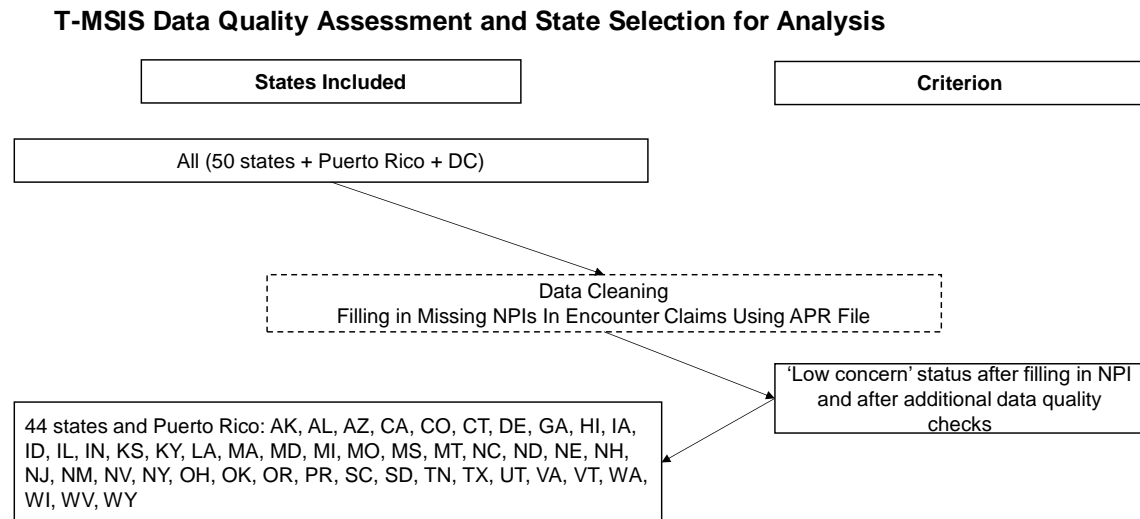

### A. Initial data quality assessment

To perform an initial assessment of states' data quality, we referred to Data Quality (DQ) Atlas (see eTable 4). Since being able to identify a physician that provided a particular service is crucial for our analysis, we required states to have 'low concern' status on the topic 'Servicing Provider NPI – Other Services (OT) File' (19 states) and on the topic 'Prescribing Provider NPI – Pharmacy (RX) File' (44 states).

However, only **16 states** met our selection criterion and relaxing it to include states with 'medium concern' data quality would have added only 13 more states. Therefore, to expand our sample size, we performed additional data cleaning based on information in the T-MSIS Annual Provider (APR) File.

### B. Data cleaning

#### I. Understanding T-MSIS file structure

Following is a brief summary of the contents of files in T-MSIS 2016.

- a) Other Services (OT) file: This file includes encounter data. It includes:
  - a. records for physician services, outpatient hospital institutional utilization, lab/X-ray, clinic services etc.
  - b. diagnosis and procedure codes for an encounter
  - c. billing and servicing provider National Provider Identifiers (NPIs)
  - d. billing and servicing state Provider Identification Numbers: These are state-assigned unique numbers to identify the provider who billed or provided a particular service
- b) Pharmacy (RX) file: This file includes information about prescriptions filled for Medicaid beneficiaries. It includes:
  - a. National Drug Codes (NDCs)
  - b. billing provider NPIs
  - c. billing state Provider Identification Numbers
- c) Annual Provider (APR) file: This file has information about providers of Medicaid services that can be linked to individual service record. It includes:
  - a. provider NPIs
  - b. provider state Provider Identification Numbers

#### II. Linking NPIs with State Provider Numbers

Since each physician has a unique NPI and a unique Provider Identification Number (in each state), it was possible to create a linkage between these two data elements.



### **III. Filling in missing NPIs in encounter and prescription data**

Next, in cases where the servicing provider NPI was missing for a particular claim but the servicing state Provider Identification Number was present, we used the 'NPI-State Provider Identification Number' linkage and filled in the servicing providing NPI for that particular claim (see figure below).

| <b>eTable 5. T-MSIS DQ Atlas Single Topic Summary</b> |                                    |                                      |                        |
|-------------------------------------------------------|------------------------------------|--------------------------------------|------------------------|
| <b>State</b>                                          | <b>Servicing Provider NPI - OT</b> | <b>Prescribing Provider NPI - RX</b> | <b>Meets Criterion</b> |
| Alabama                                               | Low concern                        | Low concern                          | Yes                    |
| Alaska                                                | Medium concern                     | Low concern                          | No                     |
| Arizona                                               | Low concern                        | Low concern                          | Yes                    |
| Arkansas                                              | Unusable                           | Low concern                          | No                     |
| California                                            | Medium concern                     | Low concern                          | No                     |
| Colorado                                              | Medium concern                     | Low concern                          | No                     |
| Connecticut                                           | High concern                       | Low concern                          | No                     |
| Delaware                                              | Medium concern                     | Low concern                          | No                     |
| District of Columbia                                  | Medium concern                     | Unusable                             | No                     |
| Florida                                               | High concern                       | Unusable                             | No                     |
| Georgia                                               | Low concern                        | Low concern                          | Yes                    |
| Hawaii                                                | Low concern                        | Low concern                          | Yes                    |
| Idaho                                                 | Medium concern                     | Low concern                          | No                     |
| Illinois                                              | High concern                       | Low concern                          | No                     |
| Indiana                                               | Low concern                        | Low concern                          | Yes                    |
| Iowa                                                  | Low concern                        | Low concern                          | Yes                    |
| Kansas                                                | High concern                       | Low concern                          | No                     |
| Kentucky                                              | Low concern                        | Low concern                          | Yes                    |
| Louisiana                                             | Low concern                        | Low concern                          | Yes                    |
| Maine                                                 | Low concern                        | Unusable                             | No                     |
| Maryland                                              | Medium concern                     | Low concern                          | No                     |
| Massachusetts                                         | High concern                       | Low concern                          | No                     |
| Michigan                                              | Low concern                        | Low concern                          | Yes                    |
| Minnesota                                             | Low concern                        | Low concern                          | Yes                    |
| Mississippi                                           | Low concern                        | Unusable                             | No                     |
| Missouri                                              | High concern                       | Low concern                          | No                     |
| Montana                                               | High concern                       | High concern                         | No                     |
| Nebraska                                              | Medium concern                     | Low concern                          | No                     |
| Nevada                                                | Low concern                        | Low concern                          | Yes                    |
| New Hampshire                                         | Medium concern                     | Low concern                          | No                     |
| New Jersey                                            | Low concern                        | Low concern                          | Yes                    |
| New Mexico                                            | Low concern                        | Low concern                          | Yes                    |
| New York                                              | Medium concern                     | Low concern                          | No                     |
| North Carolina                                        | High concern                       | Low concern                          | No                     |
| North Dakota                                          | High concern                       | Low concern                          | No                     |
| Ohio                                                  | Medium concern                     | Medium concern                       | No                     |
| Oklahoma                                              | High concern                       | Low concern                          | No                     |
| Oregon                                                | Low concern                        | Low concern                          | Yes                    |
| Pennsylvania                                          | Unusable                           | Low concern                          | No                     |
| Puerto Rico                                           | Medium concern                     | Low concern                          | No                     |

|                                                                                                                                                                                                                                                                                                                                                                                                                                                                                                                                                                 |                       |                     |     |
|-----------------------------------------------------------------------------------------------------------------------------------------------------------------------------------------------------------------------------------------------------------------------------------------------------------------------------------------------------------------------------------------------------------------------------------------------------------------------------------------------------------------------------------------------------------------|-----------------------|---------------------|-----|
| Rhode Island                                                                                                                                                                                                                                                                                                                                                                                                                                                                                                                                                    | <b>High concern</b>   | <b>Unusable</b>     | No  |
| South Carolina                                                                                                                                                                                                                                                                                                                                                                                                                                                                                                                                                  | <b>High concern</b>   | Low concern         | No  |
| South Dakota                                                                                                                                                                                                                                                                                                                                                                                                                                                                                                                                                    | Low concern           | <b>High concern</b> | No  |
| Tennessee                                                                                                                                                                                                                                                                                                                                                                                                                                                                                                                                                       | <b>High concern</b>   | Low concern         | No  |
| Texas                                                                                                                                                                                                                                                                                                                                                                                                                                                                                                                                                           | <b>High concern</b>   | Low concern         | No  |
| Utah                                                                                                                                                                                                                                                                                                                                                                                                                                                                                                                                                            | <b>Medium concern</b> | Low concern         | No  |
| Vermont                                                                                                                                                                                                                                                                                                                                                                                                                                                                                                                                                         | <b>Medium concern</b> | Low concern         | No  |
| Virginia                                                                                                                                                                                                                                                                                                                                                                                                                                                                                                                                                        | Low concern           | Low concern         | Yes |
| Washington                                                                                                                                                                                                                                                                                                                                                                                                                                                                                                                                                      | <b>High concern</b>   | Low concern         | No  |
| West Virginia                                                                                                                                                                                                                                                                                                                                                                                                                                                                                                                                                   | <b>Medium concern</b> | Low concern         | No  |
| Wisconsin                                                                                                                                                                                                                                                                                                                                                                                                                                                                                                                                                       | <b>Medium concern</b> | Low concern         | No  |
| Wyoming                                                                                                                                                                                                                                                                                                                                                                                                                                                                                                                                                         | Low concern           | Low concern         | Yes |
| <p>SOURCE: 2016 Transformed Medicaid Statistical Information System Analytic Files from and the Centers for Medicare and Medicaid Services Data Quality Atlas assessments for TMSIS Analytic Files (TAF) data year 2016, available at <a href="https://www.medicaid.gov/dq-atlas/landing/topics">https://www.medicaid.gov/dq-atlas/landing/topics</a></p> <p>NOTES: “Low Concern” and “Medium Concern” determinations come from the Centers for Medicare and Medicaid Services Data Quality Atlas assessments for TMSIS Analytic Files (TAF) data year 2016</p> |                       |                     |     |

**eFigure 3.** An Example of Filling in NPIs in T-MSIS Encounter Claims

| Before filling in NPIs |                |                |                |                        |                                          |
|------------------------|----------------|----------------|----------------|------------------------|------------------------------------------|
| Claim ID               | Beneficiary ID | Procedure Code | Diagnosis Code | Servicing Provider NPI | Servicing Provider Identification Number |
| CLM_ID_001             | BENE_ID_001    | 58300          | Z30.9          | 1234567890             | STATE_A_001                              |
| CLM_ID_002             | BENE_ID_002    | 58300          | Z30.9          | missing                | STATE_A_001                              |
| CLM_ID_003             | BENE_ID_003    | 58300          | Z30.9          | missing                | STATE_A_001                              |

↓

| After filling in NPIs |                |                |                |                        |                                          |
|-----------------------|----------------|----------------|----------------|------------------------|------------------------------------------|
| Claim ID              | Beneficiary ID | Procedure Code | Diagnosis Code | Servicing Provider NPI | Servicing Provider Identification Number |
| CLM_ID_001            | BENE_ID_001    | 58300          | Z30.9          | 1234567890             | STATE_A_001                              |
| CLM_ID_002            | BENE_ID_002    | 58300          | Z30.9          | 1234567890             | STATE_A_001                              |
| CLM_ID_003            | BENE_ID_003    | 58300          | Z30.9          | 1234567890             | STATE_A_001                              |

This enabled us to improve the quality of many states' encounter data on servicing and prescribing provider NPIs.

We would like to note that state categorization based on missingness of state-assigned Provider Identification Numbers is currently not available in the DQ Atlas.

#### IV. Reassessing states' data quality

As the final step of state selection for analysis, we performed additional checks on states' data.

First, we calculated the percentage of each state's total submitted claim lines that had missing servicing providing NPIs, after performing the data cleaning described earlier. We categorized states' OT file data as having 'low concern' if less than 10% of their claim lines had missing servicing NPIs. Similarly, states which had missing servicing provider NPIs in 10 to 20% of the claim lines were categorized as having 'medium concern' data. States which did not have servicing NPIs in 20 to 50% of their claim lines were categorized as having 'high concern' data and if more than 50% of claim lines had missing servicing provider NPIs, data from such states was categorized as 'unusable'. The categorization used for RX files was similar (0-10% claim lines missing prescribing NPIs = low concern; 10-20% missing = medium concern; 20-50% missing = high concern; more than 50% missing = unusable)

We excluded states that had 'high concern' or 'unusable' data quality status for either file. The result of this recategorization of states is summarized in eTable 5.

During this process, we also checked for unusual data patterns and for data anomalies. We found that Minnesota's T-MSIS 2016 OT file reported NPIs and State Provider Numbers of managed care organizations and not of individual providers in the 'Servicing Provider NPI' and 'Servicing Provider Identification Number' fields. Since this is inaccurate, we categorized Minnesota's data as 'unusable' for analysis. On the other hand, Mississippi's RX data had received 'unusable' status in the DQ Atlas since the 'Prescribing Provider NPI' filed in the state's OT file had a lot of missing data. After data cleaning, we were able to remedy this situation and we subsequently categorized Mississippi's data as 'low concern'.

After performing data quality reassessment, our final analytical sample included the 44 states and Puerto Rico. We excluded 6 states (Arkansas, Florida, Maine, Minnesota, Pennsylvania, Rhode Island) and Washington, DC from the analysis.

| <b>eTable 6. State Data Quality Assessment and Sample Selection</b> |                                                  |                                                    |                         |
|---------------------------------------------------------------------|--------------------------------------------------|----------------------------------------------------|-------------------------|
| <b>State</b>                                                        | <b>Post-cleaning Servicing Provider NPI – OT</b> | <b>Post-cleaning Prescribing Provider NPI – RX</b> | <b>Sample Inclusion</b> |
| Alabama                                                             | Low Concern                                      | Low Concern                                        | Included                |
| Alaska                                                              | Low Concern                                      | Low Concern                                        | Included                |
| Arizona                                                             | Low Concern                                      | Low Concern                                        | Included                |
| Arkansas                                                            | <b>Unusable</b>                                  | Low Concern                                        | Excluded                |
| California                                                          | <b>Medium Concern</b>                            | Low Concern                                        | Included                |
| Colorado                                                            | <b>Medium Concern</b>                            | Low Concern                                        | Included                |
| Connecticut                                                         | Low Concern                                      | Low Concern                                        | Included                |
| Delaware                                                            | Low Concern                                      | Low Concern                                        | Included                |
| District Of Columbia                                                | <b>Medium Concern</b>                            | <b>Unusable</b>                                    | Excluded                |
| Florida                                                             | Low Concern                                      | <b>Unusable</b>                                    | Excluded                |
| Georgia                                                             | Low Concern                                      | Low Concern                                        | Included                |
| Hawaii                                                              | Low Concern                                      | Low Concern                                        | Included                |
| Idaho                                                               | Low Concern                                      | Low Concern                                        | Included                |
| Illinois                                                            | Low Concern                                      | Low Concern                                        | Included                |
| Indiana                                                             | Low Concern                                      | Low Concern                                        | Included                |
| Iowa                                                                | Low Concern                                      | Low Concern                                        | Included                |
| Kansas                                                              | Low Concern                                      | Low Concern                                        | Included                |
| Kentucky                                                            | Low Concern                                      | Low Concern                                        | Included                |
| Louisiana                                                           | Low Concern                                      | Low Concern                                        | Included                |
| Maine                                                               | Low Concern                                      | <b>Unusable</b>                                    | Excluded                |
| Maryland                                                            | Low Concern                                      | Low Concern                                        | Included                |
| Massachusetts                                                       | Low Concern                                      | Low Concern                                        | Included                |
| Michigan                                                            | Low Concern                                      | Low Concern                                        | Included                |
| Minnesota                                                           | <b>Unusable</b>                                  | Low Concern                                        | Excluded                |
| Mississippi                                                         | Low Concern                                      | Low Concern                                        | Included                |
| Missouri                                                            | Low Concern                                      | Low Concern                                        | Included                |
| Montana                                                             | Low Concern                                      | Low Concern                                        | Included                |
| Nebraska                                                            | Low Concern                                      | Low Concern                                        | Included                |
| Nevada                                                              | Low Concern                                      | Low Concern                                        | Included                |
| New Hampshire                                                       | Low Concern                                      | Low Concern                                        | Included                |
| New Jersey                                                          | Low Concern                                      | Low Concern                                        | Included                |
| New Mexico                                                          | Low Concern                                      | Low Concern                                        | Included                |
| New York                                                            | Low Concern                                      | Low Concern                                        | Included                |
| North Carolina                                                      | Low Concern                                      | Low Concern                                        | Included                |
| North Dakota                                                        | Low Concern                                      | Low Concern                                        | Included                |
| Ohio                                                                | Low Concern                                      | Low Concern                                        | Included                |
| Oklahoma                                                            | Low Concern                                      | Low Concern                                        | Included                |
| Oregon                                                              | Low Concern                                      | Low Concern                                        | Included                |

|                |                       |                       |          |
|----------------|-----------------------|-----------------------|----------|
| Pennsylvania   | <b>High Concern</b>   | Low Concern           | Excluded |
| Puerto Rico    | Low Concern           | Low Concern           | Included |
| Rhode Island   | Low Concern           | <b>Unusable</b>       | Excluded |
| South Carolina | Low Concern           | Low Concern           | Included |
| South Dakota   | Low Concern           | <b>Medium Concern</b> | Included |
| Tennessee      | Low Concern           | Low Concern           | Included |
| Texas          | Low Concern           | Low Concern           | Included |
| Utah           | <b>Medium Concern</b> | Low Concern           | Included |
| Vermont        | Low Concern           | Low Concern           | Included |
| Virginia       | Low Concern           | Low Concern           | Included |
| Washington     | Low Concern           | Low Concern           | Included |
| West Virginia  | <b>Medium Concern</b> | Low Concern           | Included |
| Wisconsin      | Low Concern           | Low Concern           | Included |
| Wyoming        | Low Concern           | Low Concern           | Included |

**eFigure 4. Physician State Reassignment Process Example**

We assigned a state to each physician in the sample based on the number of Medicaid claims submitted. For example, if a physician was located in state A according to the NPPES but had most or all of their claims submitted to state B Medicaid program, then for the purpose of this analysis, we assigned state B as that physician's state (see Physicians #3 and #4 in the example below).

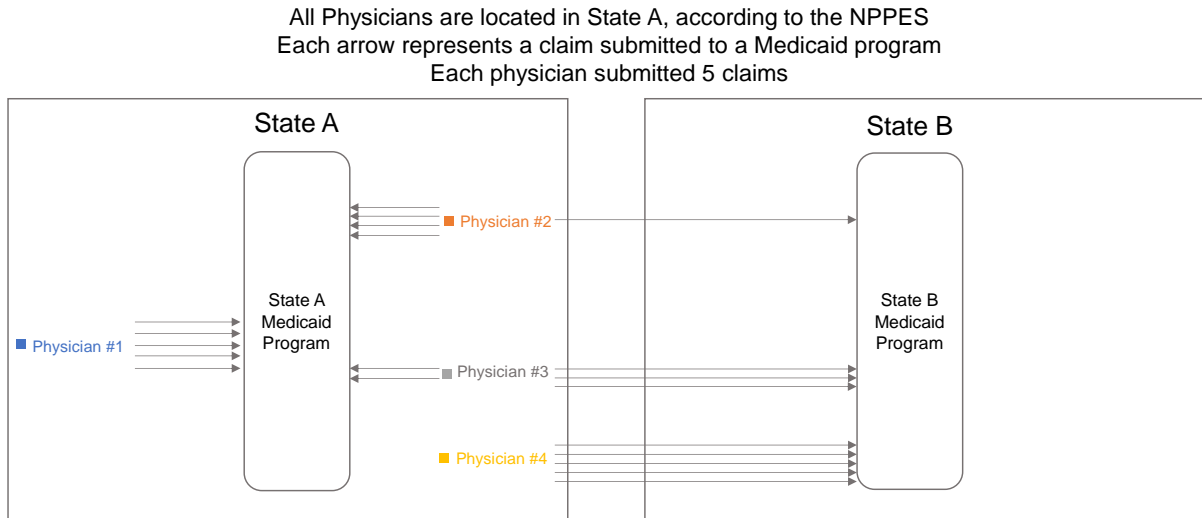

- Assigned to the same state as noted in the NPPES and submitted claims to a single state's Medicaid program (state A)
- Assigned to the same state as noted in the NPPES and submitted claims to multiple states' Medicaid programs (state A and state B)
- Assigned to a state different from their NPPES state and submitted claims to multiple states' Medicaid programs (state A and state B)
- Assigned to a state different from their NPPES state and submitted claims to a single state's Medicaid program (state B)

## eFigure 5. Physician State Reassignment Details

Physicians in the sample (N) = 251,107

- A. Assigned to the same state as noted in the NPPES and submitted claims to a single state's Medicaid program (147,721)
- B. Assigned to the same state as noted in the NPPES and submitted claims to multiple states' Medicaid programs (84,408)
- C. Assigned to a state different from their NPPES state and submitted claims to multiple states' Medicaid programs (12,261)
- D. Assigned to a state different from their NPPES state and submitted claims to a single state's Medicaid program (6,717)

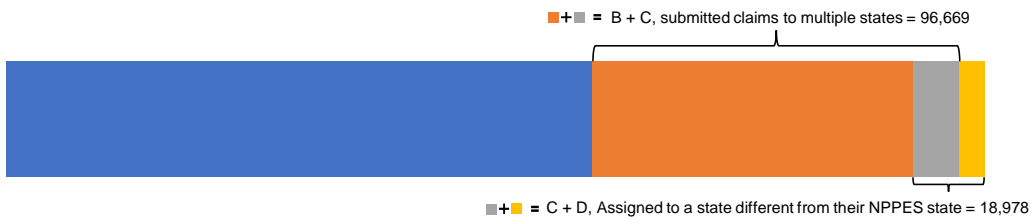

Supplement: jamahealthforum-e230106-s001.pdf [file jamahealthforum-e230106-s001.pdf]
