# Supplementary material for: Association of Primary Care Physicians’ Individual- and Community-Level Characteristics With Contraceptive Service Provision to Medicaid Beneficiaries
Source: PubMed Central journal article supplement (PMC10024198; doi:10.1001/jamahealthforum.2023.0106), 2023-03-17
Supplement: jamahealthforum-e230106-s002.pdf [file jamahealthforum-e230106-s002.pdf]

## Data Sharing Statement

Bodas. Association of Primary Care Physicians' Individual- and Community-Level Characteristics With Contraceptive Service Provision to Medicaid Beneficiaries. *JAMA Health Forum*. Published March 17, 2023. doi:10.1001/jamahealthforum.2023.0106

### Data

**Data available:** No
